# Supplementary material
Source: PubMed Central journal article supplement (PMC3113601)
Supplement: NIHMS293376-supplement-01.pdf [file NIHMS293376-supplement-01.pdf]

## **Supplementary Material**

for the Manuscript

" Early Time Points Perfusion Imaging: Theoretical Analysis of Correction Factors for Relative Cerebral Blood Flow Estimation Given Local Arterial Input Function"

## Second recipe to apply the correction factor for C(t)

Pre-select a single value S and set all the different correction factors  $\int_0^t AIF(\tau)d\tau$  equal to S. For two different AIF's, the question to solve next is to obtain the proper time limit  $t_1$  and  $t_2$  such that

$$\int_0^{t_1} AIF_1(\tau)d\tau = \int_0^{t_2} AIF_2(\tau)d\tau = S.$$

Given  $C(t) \approx f \int_0^t AIF(\tau)d\tau$ , it is clear that if

$$\int_0^{t_1} AIF_1(\tau)d\tau = \int_0^{t_2} AIF_2(\tau)d\tau = S, \quad \text{then} \quad \frac{C_1(t_1)}{C_2(t_2)} = \frac{f_1}{f_2}$$

with  $C_1(t)$  and  $C_2(t)$  from separate regions of tissue fed by  $AIF_1$  and  $AIF_2$ . The recovered  $t_1$  and  $t_2$  values are required to be smaller than  $T$ , the tissue mean transit time, thereby meeting ET's basic assumption.

Given normalization of the correction factor, the single value S should be a fractional number (less than 1), indicating the percentage of the total integral ( $\int_0^\infty AIF(\tau)d\tau$ ). For  $AIF_1$  and  $AIF_2$ , the idea is to find the  $t_1$  and  $t_2$  where the integral of  $AIF_1$  and that of  $AIF_2$  reach the same percentage of their respective total AIF signal. The single value S to be picked for experimental data is somewhat arbitrary with the only requirement being that  $t$  recovered would be smaller than  $T$ , the tissue mean transit time. Since we do not know the  $T$  value *a priori*, one tentative choice could be testing the usefulness of S in the range of values such that  $t_1$  and  $t_2$  recovered are smaller than TMD1.

While the second recipe can be used to set up correction factors to  $C(t)$ , and similarly to  $\frac{d}{dt}C(t)$  and  $\frac{d^2}{dt^2}C(t)$ , it cannot be used to set up correction factors for MD1 and MD2. So we

will limit our investigation of the correction factor applied to  $C(t)$  as a representative study for the second recipe.

*Second Recipe of correction factor given the normalized gamma-variate function model for AIF*

Since the integral of local AIF is given by  $P(t, a)$  when the gamma-variate function  $e^{-t}t^{a-1}$  is used as a model for AIF, the second recipe can be demonstrated by pre-selecting a single constant value (a fractional number)  $S$  and then identifying the time point  $t$  that would set  $P(t, a)$  of each local AIF to be equal to  $S$ . The value of the time point  $t$  can be obtained by the Matlab routine calculating the inverse incomplete gamma function which recovers  $t$  from  $P(t, a)$ . One can also employ a graphical method finding the intersection between the line of  $S$  and the plots of various  $P(t, a)$ . The intersection time points are the desired time results.

If  $P(t_1, a) = P(t_2, a) = S$ , then  $\frac{c_1(t_1)}{c_2(t_2)} = \frac{f_1}{f_2}$

*Results of the correction factors generated using the second recipe*

For the second recipe, the arbitrary single value  $S$  to pick is somewhat tricky. There is no simple guideline on how to come up with the value of  $S$  which can guarantee that  $t$  from  $P(t, a)$  would be shorter than tissue mean transit time  $T$ . All we can say is that if such a constant  $S$  can be found, than  $t_1$  and  $t_2$  can be determined for  $C_1(t_1)$  and  $C_2(t_2)$ .

We can use TMD1 as a guide for setting up a limit for any  $t$  recovered for  $P(t, a)$ . For example, if we take pre-selected single value  $S=0.3$ , the time  $t$  obtained from each  $P(t, a)$  can be compared with TMD1 (Fig S1),

for  $a=3$ ,  $t = 1.9138$  vs. TMD1=2

for  $a=4$ ,  $t = 2.7637$  vs. TMD1=3

for  $a=5$ ,  $t = 3.6736$  vs. TMD1=4

So  $S=0.3$  could be considered a reasonable constant value to be used for the second recipe.

## Figure Caption

**Fig. S1.** Graphs of  $P(t, 3)$ ,  $P(t, 4)$  and  $P(t, 5)$ , representing correction factors of  $C(t)$  given different local AIF's modeled by the normalized version of gamma-variate function  $e^{-t}t^{a-1}$  with parameter  $a$  equal to 3, 4, and 5. An horizontal line (indicated by arrow) representing a predetermined constant value  $S=0.3$  intersects with  $P(t, 3)$ ,  $P(t, 4)$  and  $P(t, 5)$  and the three time points at the intersection ( $t = 1.9138, 2.7637$  and  $3.6736$ ) are selected for the respective  $C(t)$  associated with each local AIF for the purpose of evaluating rCBF by ET. The three time points, recovered in this figure by a graphic method and with their located indicated by three dotted vertical half lines, can also be obtained by the Matlab routine calculating the inverse incomplete gamma function which recovers  $t$  for  $P(t, a) = S$  with  $a$  equal to 3, 4 and 5. The Matlab approach was described in the text of the Supplementary Material. The constant value  $S$  was selected under the condition that the recovered  $t$  is smaller than TMD1 of each  $P(t, a)$ . Given  $P(t, a)$ , TMD1=2, 3, 4 for  $a = 3, 4, 5$ .

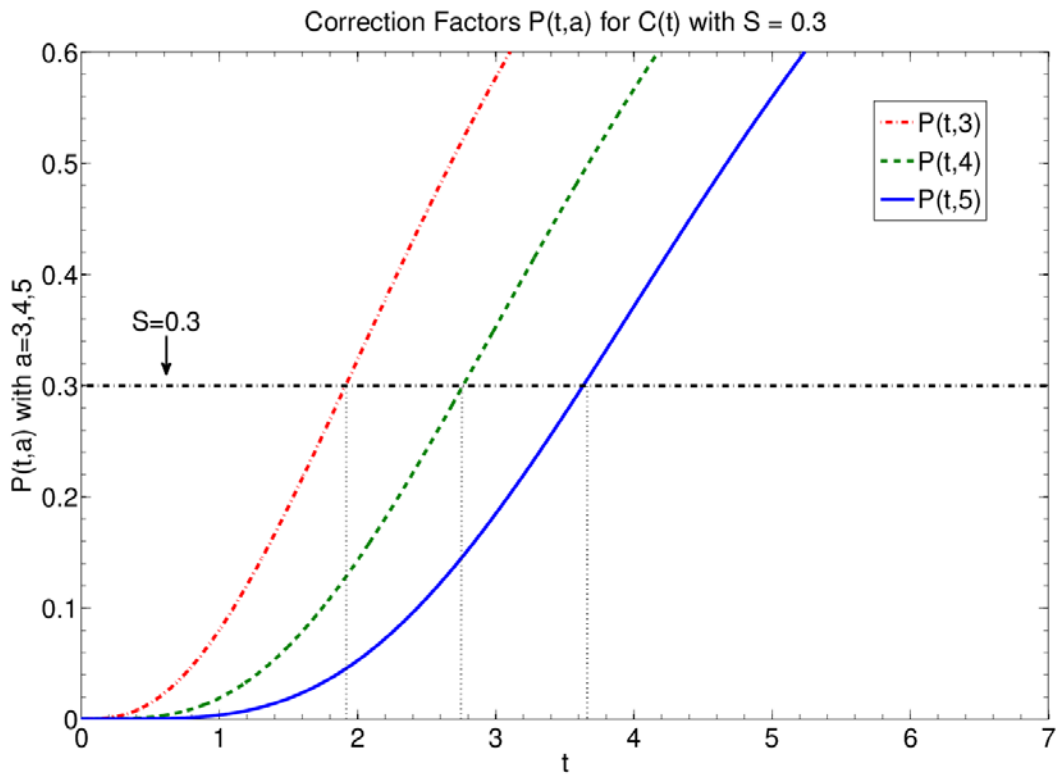

**Fig S1**
